# Supplementary material
Source: Springer Nature journal article supplement (https://www.springermedizin.de/resource/supplementary/13054_2010_8479_MOESM2_ESM.pdf/9732060)

A

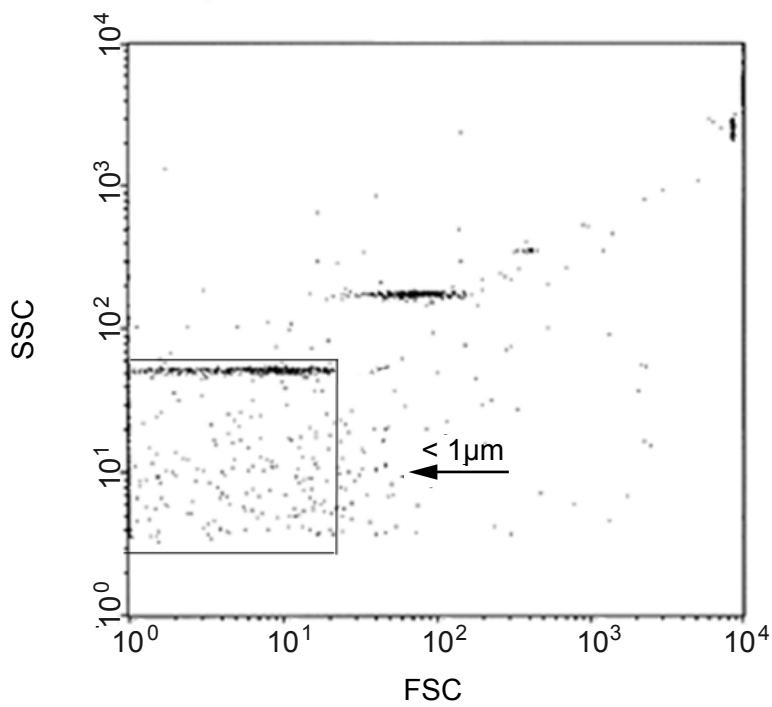

B

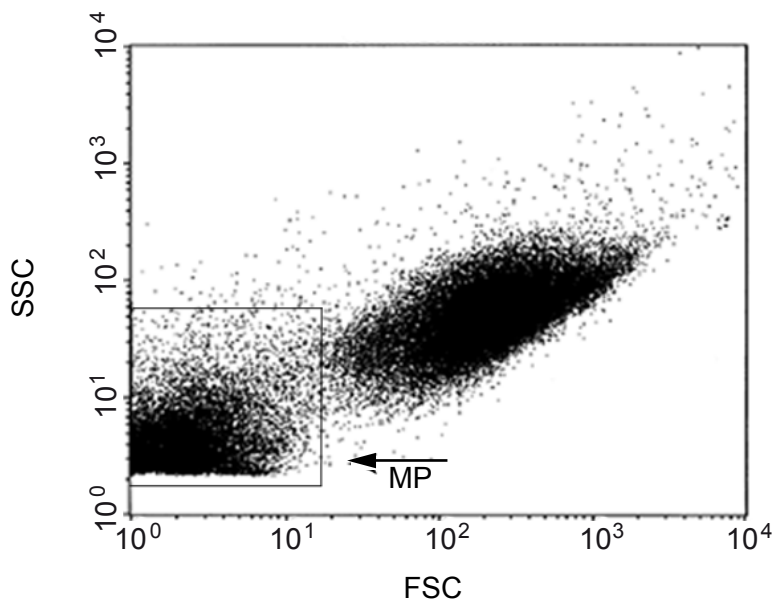

C

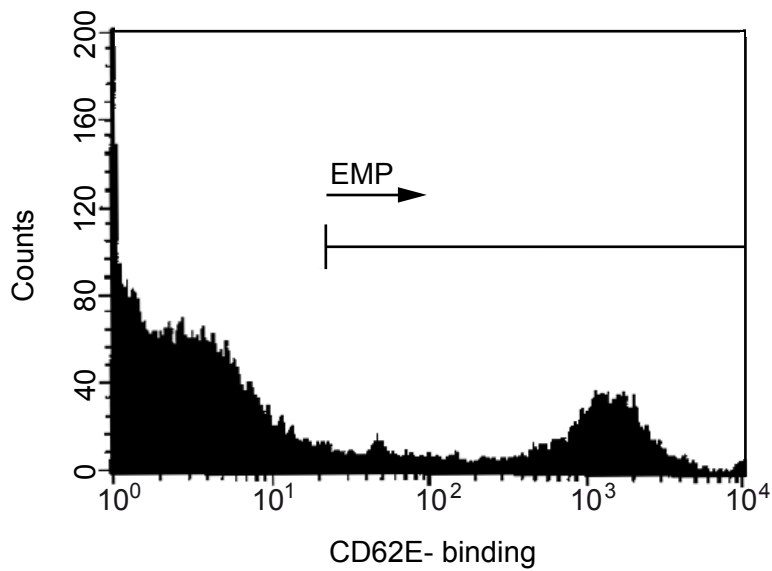

Supplement: MOESM2 [file 9732060]
